# Supplementary material
Source: publisher site journal article supplement (https://www.dovepress.com/article/429521)
Supplement: Supplementary file 1 [file get_supplementary_file.php]

Table S1. MK, MKT and CBF values between patients with non-NPSLE and the healthy controls in all ROIs.

|  | Brain Region | MK Mean | | *P* |  | MKT Mean | | *P* |  | CBF Mean [mL/100g/ min] | | *P* |
| --- | --- | --- | --- | --- | --- | --- | --- | --- | --- | --- | --- | --- |
| non-NPSLE | HC |  | non-NPSLE | HC |  | non-NPSLE | HC |
| GM | L frontal | 0.98±0.05 | 1.00±0.04 | 0.041 |  | 0.97±0.06 | 1.0±0.04 | 0.070 |  | 44.76±9.82 | 46.08±9.50 | 0.421 |
| R frontal | 0.98±0.06 | 0.99±0.06 | 0.709 |  | 0.99±0.06 | 0.99±0.06 | 0.945 |  | 45.62±7.35 | 45.79±9.21 | 0.864 |
| L parietal | 0.95±0.07 | 0.93±0.06 | 0.226 |  | 0.95±0.06 | 0.92±0.09 | 0.145 |  | 46.52±10.81 | 44.19±9.05 | 0.364 |
| R parietal | 0.94±0.06 | 0.92±0.08 | 0.262 |  | 0.94±0.05 | 0.93±0.06 | 0.601 |  | 45.65±8.13 | 44.07±10.15 | 0.525 |
| L temporal | 0.97±0.07 | 0.96±0.05 | 0.284 |  | 0.98±0.07 | 0.97±0.05 | 0.129 |  | 44.98±10.68 | 47.18±8.89 | 0.301 |
| R temporal | 0.97±0.06 | 0.97±0.05 | 0.850 |  | 0.97±0.05 | 0.98±0.05 | 0.492 |  | 44.07±9.58 | 45.17±9.21 | 0.771 |
| L occipital | 0.98±0.07 | 0.98±0.07 | 0.925 |  | 0.99±0.06 | 0.99±0.07 | 0.825 |  | 45.68±9.91 | 47.5±8.47 | 0.491 |
| R occipital | 0.99±0.06 | 0.99±0.07 | 0.902 |  | 0.97±0.05 | 1.00±0.08 | 0.102 |  | 49.39±9.84 | 45.91±9.18 | 0.199 |
| deep GM | L thalamus | 1.26±0.09 | 1.31±0.12 | 0.039 |  | 1.26±0.08 | 1.32±0.11 | 0.023 |  | 37.67±6.92 | 36.42±6.21 | 0.478 |
| R thalamus | 1.24±0.09 | 1.30±0.11 | 0.036 |  | 1.24±0.09 | 1.34±0.12 | 0.0008 |  | 36.43±8.44 | 35.89±4.80 | 0.952 |
| L caudate nucleus | 1.17±0.10 | 1.18±0.07 | 0.732 |  | 1.18±0.08 | 1.17±0.07 | 0.665 |  | 43.36±8.18 | 43.4±7.42 | 0.831 |
| R caudate nucleus | 1.18±0.09 | 1.18±0.07 | 0.771 |  | 1.17±0.09 | 1.17±0.08 | 0.960 |  | 41.43±7.67 | 43.45±10.11 | 0.405 |
| L LN | 1.26±0.11 | 1.36±0.12 | 0.0028 |  | 1.29±0.11 | 1.35±0.12 | 0.044 |  | 35.42±5.58 | 37.26±4.60 | 0.216 |
| R LN | 1.26±0.10 | 1.36±0.12 | 0.003 |  | 1.27±0.10 | 1.36±0.13 | 0.007 |  | 37.50±6.45 | 37.56±6.41 | 0.972 |
| WM | SCC | 1.45±0.14 | 1.59±0.18 | 0.002 |  | 1.28±0.10 | 1.26±0.08 | 0.332 |  | 38.03±8.43 | 39.42±6.84 | 0.739 |
| L SOC | 1.50±0.11 | 1.57±0.07 | 0.028 |  | 1.43±0.09 | 1.50±0.05 | 0.007 |  | 25.92±6.33 | 23.11±4.25 | 0.086 |
| R SOC | 1.52±0.10 | 1.59±0.06 | 0.023 |  | 1.47±0.09 | 1.55±0.05 | 0.003 |  | 26.34±6.36 | 22.56±4.51 | 0.023 |
| L frontal | 1.37±0.13 | 1.47±0.08 | 0.002 |  | 1.37±0.14 | 1.46±0.10 | 0.011 |  | 29.14±6.98 | 29.37±5.23 | 0.900 |
| R frontal | 1.36±0.13 | 1.43±0.09 | 0.050 |  | 1.39±0.13 | 1.45±0.11 | 0.098 |  | 31.40±7.78 | 31.74±6.75 | 0.869 |
| L parietal | 1.46±0.14 | 1.51±0.12 | 0.174 |  | 1.36±0.12 | 1.41±0.09 | 0.063 |  | 33.73±6.35 | 33.49±5.00 | 0.885 |
| R parietal | 1.44±0.12 | 1.49±0.10 | 0.093 |  | 1.37±0.10 | 1.42±0.09 | 0.091 |  | 32.89±5.69 | 29.77±5.13 | 0.047 |
| L temporal | 1.35±0.13 | 1.42±0.06 | 0.054 |  | 1.32±0.10 | 1.38±0.08 | 0.049 |  | 30.91±6.07 | 31.13±5.82 | 0.898 |
| R temporal | 1.36±0.13 | 1.44±0.09 | 0.021 |  | 1.36±0.12 | 1.38±0.07 | 0.726 |  | 29.85±7.36 | 30.44±6.66 | 0.918 |
| L occipital | 1.40±0.11 | 1.41±0.07 | 0.720 |  | 1.35±0.11 | 1.40±0.07 | 0.011 |  | 30.48±6.45 | 28.43±6.72 | 0.266 |
| R occipital | 1.39±0.10 | 1.44±0.06 | 0.012 |  | 1.36±0.10 | 1.41±0.06 | 0.109 |  | 28.89±8.18 | 28.19±6.43 | 0.739 |

GM, gray matter; WM, white matter; MK, mean kurtosis; MKT, mean kurtosis tensor; CBF, cerebral blood flow；SOC, semioval centre; LN, lenticular nucleus; SCC, splenium of corpus callosum. L/R, left/right; Student t test and Wilcox test were used to compare the mean between two groups. P-value less than 0.05 was considered significant.
